# Supplementary material for: MicroRNA-15b Modulates Molecular Mediators of Blood Induced Arthropathy in Hemophilia Mice
Source: MDPI journal article supplement (doi:10.3390/ijms17040492), 2016-04-08
Supplement: s1 [file s1]

# Supplementary Materials: MicroRNA-15b Modulates Molecular Mediators of Blood Induced Arthropathy in Hemophilia Mice

Dwaipayan Sen and Giridhara R. Jayandharan

**Table S1.** Primers used for real time PCR amplification of MMP 1–17 target genes.

| Primer            | Sequence: 5' to 3'         |
|-------------------|----------------------------|
| MMP-1-sense       | AGTCTTTGAGGAGGAAGGCGATA    |
| MMP-1-anti-sense  | CAAACCTAGGCCTGGCAGAA       |
| MMP-2-sense       | CAGGGAATGAGTACTGGGTCTATT   |
| MMP-2-anti-sense  | ACTCCAGTTAAAGGCAGCATCTAC   |
| MMP3-sense        | AGGAAATCCCACATCACCTACAG    |
| MMP3-anti-sense   | TTTTCAATGGCAGAATCCACACT    |
| MMP-7-sense       | TGAATTTGGCCACTCTCTGGGTCT   |
| MMP-7-anti-sense  | TCTGAATGCCTGCAATGTCGTCCT   |
| MMP-8-sense       | AATCCTTGCCCATGCCTTTCAACC   |
| MMP-8-anti-sense  | CCAAATTCATGAGCAGCCACGAGA   |
| MMP-9-sense       | AATCTCTTCTAGAGACTGGGAAGGAG |
| MMP-9-anti-sense  | AGCTGATTGACTAAAGTAGCTGGA   |
| MMP-10-sense      | GACCCCAGACAAATGTGATCCT     |
| MMP-10-anti-sense | TTCAGGCTCGGGATTCCA         |
| MMP-11-sense      | CAGCGTGTTCTCTTTCCAT        |
| MMP-11-anti-sense | AAGAGCTCTCCTCGGATGGT       |
| MMP-12-sense      | CCCAGAGGTCAAGATGGATG       |
| MMP-12-anti-sense | AAGTCTCCGTGAGCTCCAAA       |
| MMP-13-sense      | TAGATGGGAAACATCAGGGC       |
| MMP-13-anti-sense | TGATGAAACCTGGACAAGCA       |
| MMP14-sense       | CCCTAGGCCTGGAACATTCT       |
| MMP14-anti-sense  | TTTGGGCTTATCTGGGACAG       |
| MMP-15-sense      | CCTCCACGACAAGAAGTGT        |
| MMP-15-anti-sense | GGAAAGAAGCTGCAGAATGC       |
| MMP-16-sense      | GGAGACAGTTCCCCATTGA        |
| MMP-16 anti-sense | CGTTGGAATGTTCCAGTCCT       |
| MMP-17-sense      | CAGGAGGAACTGTCCAAAGC       |
| MMP-17-anti-sense | CCCTCCAAGAAAGGTTCTC        |

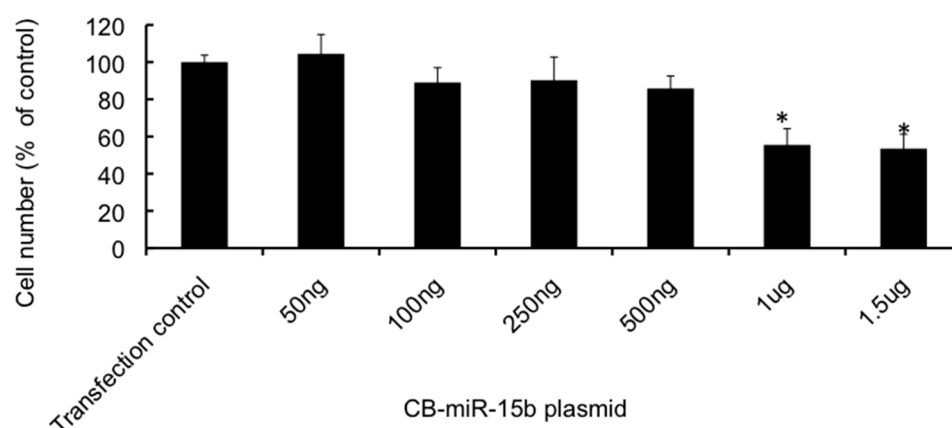

**Figure S1.** *In vitro* dose finding studies with CB-miR-15b plasmid vectors. NIH3T3 cells were transfected with various concentrations of CB-miR-15b plasmid. After 48 h, MTT assay was performed. Cell viability is represented as percentage of control cells that were mock transfected.  $n = 6$  replicates for each condition, \*  $p < 0.05$ .

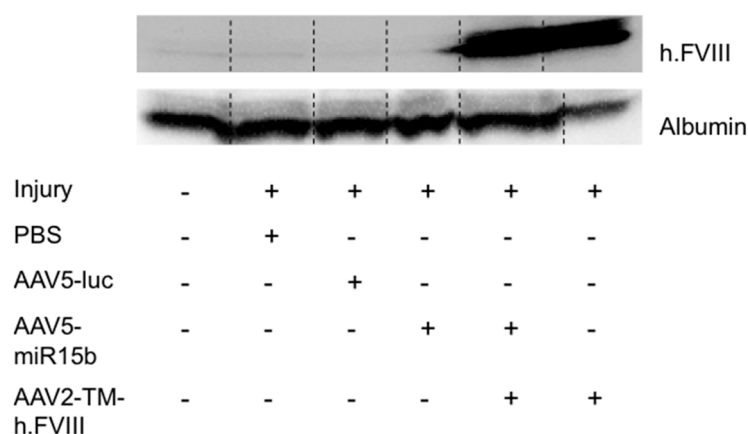

**Figure S2.** Immunoblotting for h.FVIII light chain. FVIII was detected in pooled serum from the different groups of haemophilia A mice. Albumin levels were concurrently determined and compared as loading controls.

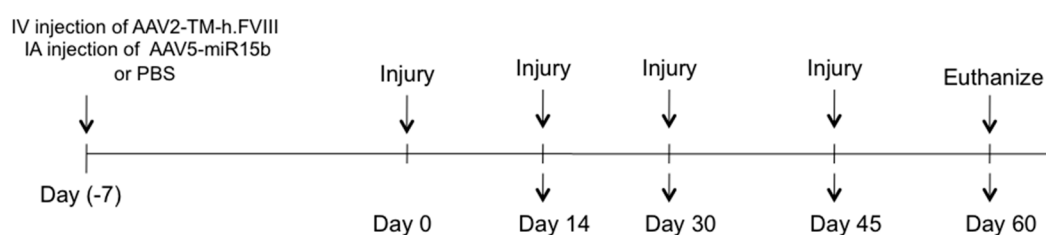

**Figure S3.** Schedule of gene transfer and injuries in the multiple hemarthrosis model. A week before first injury, animals received PBS or AAV vectors expressing Luc or the miR-15b Intra-articularly (left knee) at a dose of  $5 \times 10^9$  vgs/knee joint. Groups of animals were also administered with  $5 \times 10^9$  vgs/animal of AAV2-TM-h.FVIII vectors *via* the tail vein. Seven days post vector administrations, the first injury was inflicted on the left knee (day 0) using a 30g needle. Subsequent reinjuries were done at an interval of 14 days followed by euthanization at day 60 for further histological, molecular and biochemical studies. IV-Intravenous, IA-Intra-articular.
